# Supplementary material for: Admission risk factors and predictors of moderate or severe pediatric acute pancreatitis: A systematic review and meta-analysis
Source: PubMed Central journal article supplement (PMC9561825; doi:10.3389/fped.2022.947545), 2022-09-30
Supplement: Data_Sheet_1.pdf [file Data_Sheet_1.pdf]

## Supplementary Material

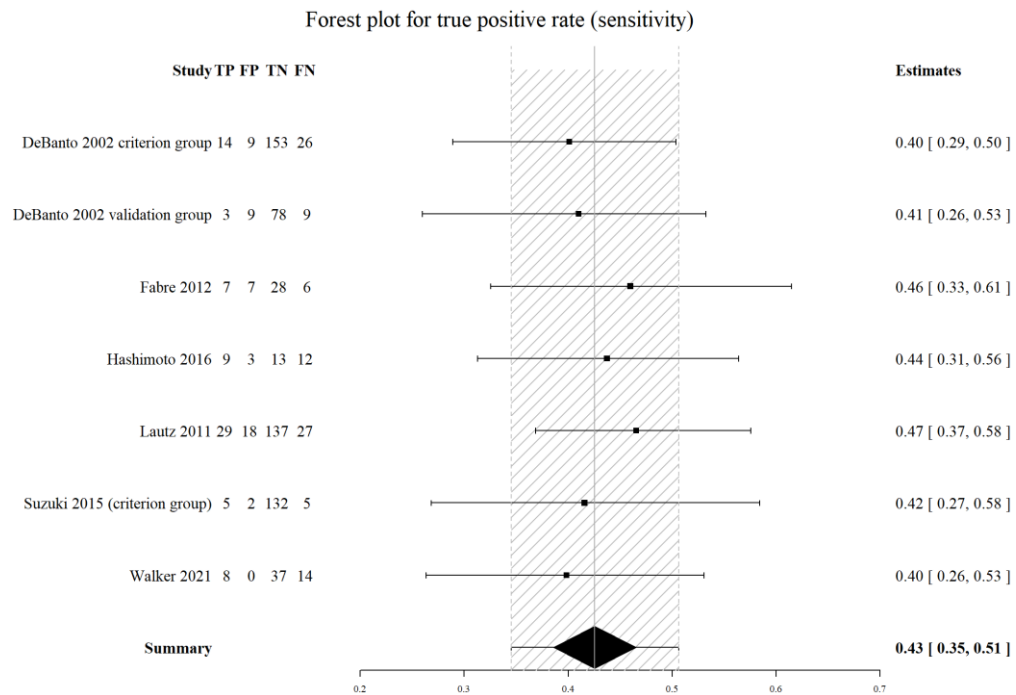

**Supplementary Figure 1** Forest plot for sensitivity for modified Glasgow score predicting moderate or severe pediatric acute pancreatitis with a score of 3 or higher (TP: true positive; FP: false positive; TN: true negative; FN: false negative)

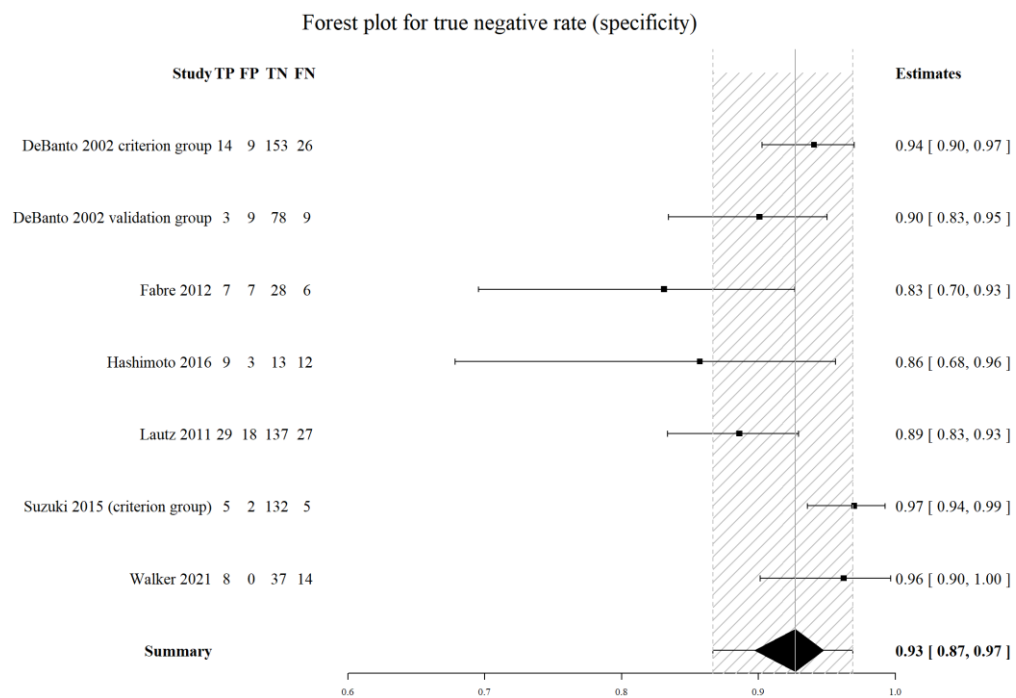

**Supplementary Figure 2** Forest plot for specificity for modified Glasgow score predicting moderate or severe pediatric acute pancreatitis with a score of 3 or higher (TP: true positive; FP: false positive; TN: true negative; FN: false negative)

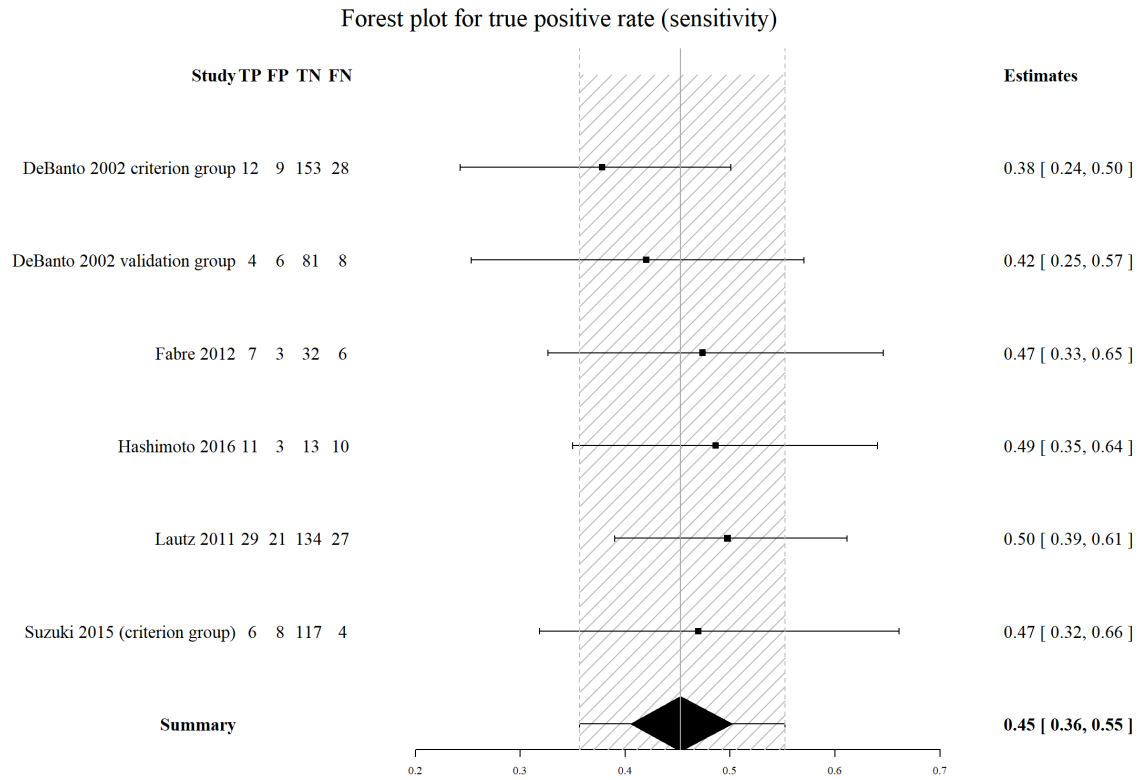

**Supplementary Figure 3** Forest plot for sensitivity for Ranson criteria predicting moderate or severe pediatric acute pancreatitis with a score of 3 or higher (TP: true positive; FP: false positive; TN: true negative; FN: false negative)

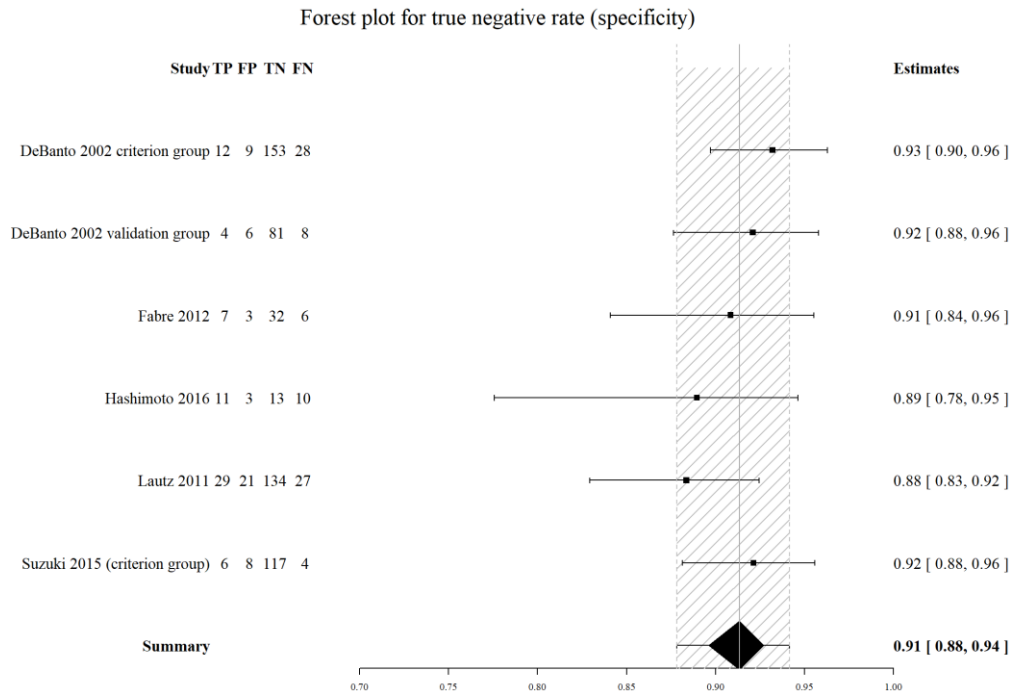

**Supplementary Figure 4** Forest plot for specificity for Ranson criteria predicting moderate or severe pediatric acute pancreatitis with a score of 3 or higher (TP: true positive; FP: false positive; TN: true negative; FN: false negative)

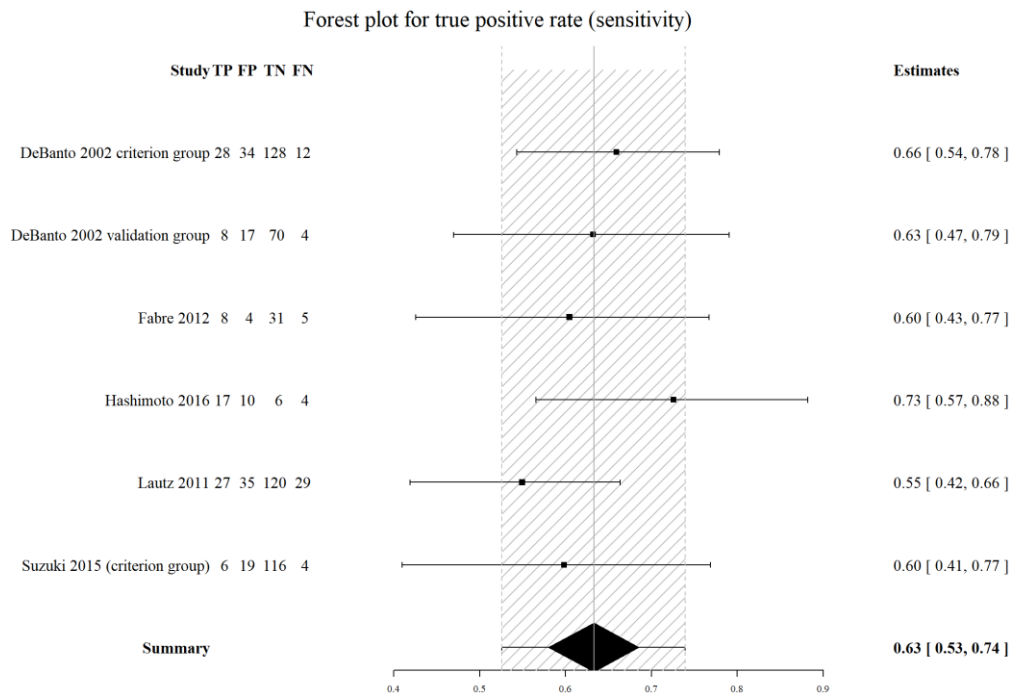

**Supplementary Figure 5** Forest plot for sensitivity for Pediatric Acute Pancreatitis Severity (PAPS) score predicting moderate or severe pediatric acute pancreatitis with a score of 3 or higher (TP: true positive; FP: false positive; TN: true negative; FN: false negative)

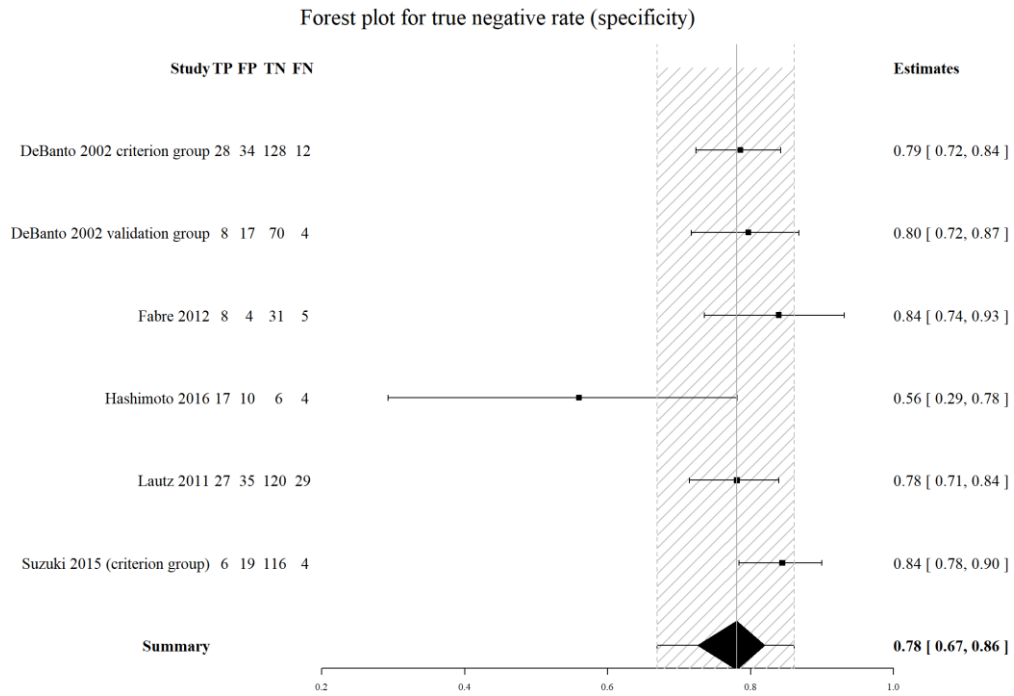

**Supplementary Figure 6** Forest plot for specificity for Pediatric Acute Pancreatitis Severity (PAPS) score predicting moderate or severe pediatric acute pancreatitis with a score of 3 or higher (TP: true positive; FP: false positive; TN: true negative; FN: false negative)

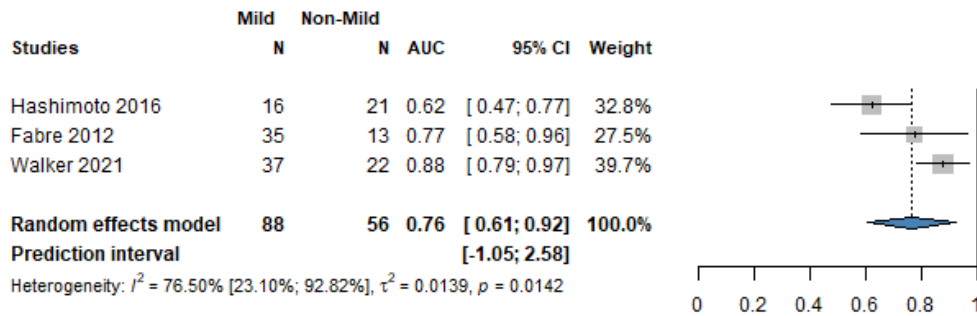

**Supplementary Figure 7** Meta-analysis of AUC values for modified Glasgow score predicting moderate or severe pediatric acute pancreatitis with a score of 3 or higher (M/SPAP: moderate or severe pediatric acute pancreatitis; N: patient number; AUC: area under the curve; CI: confidence interval)

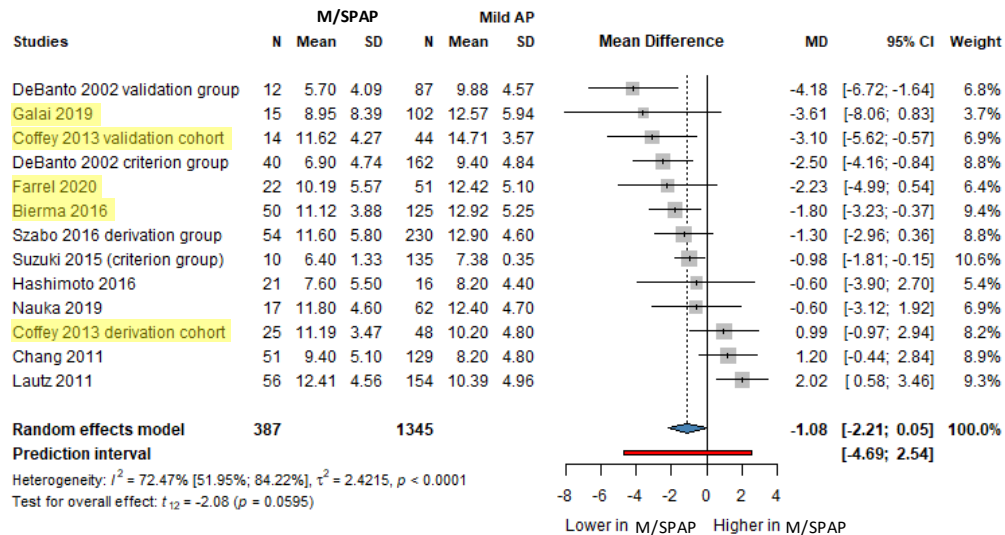

**Supplementary Figure 8** Forest plot for age of onset of pediatric acute pancreatitis. A yellow background indicates that data had to be converted from medians with interquartile ranges to means with SD (AP: acute pancreatitis; M/SPAP: moderate or severe pediatric acute pancreatitis; N: patient number; SD: standard deviation; MD: mean difference; CI: confidence interval)

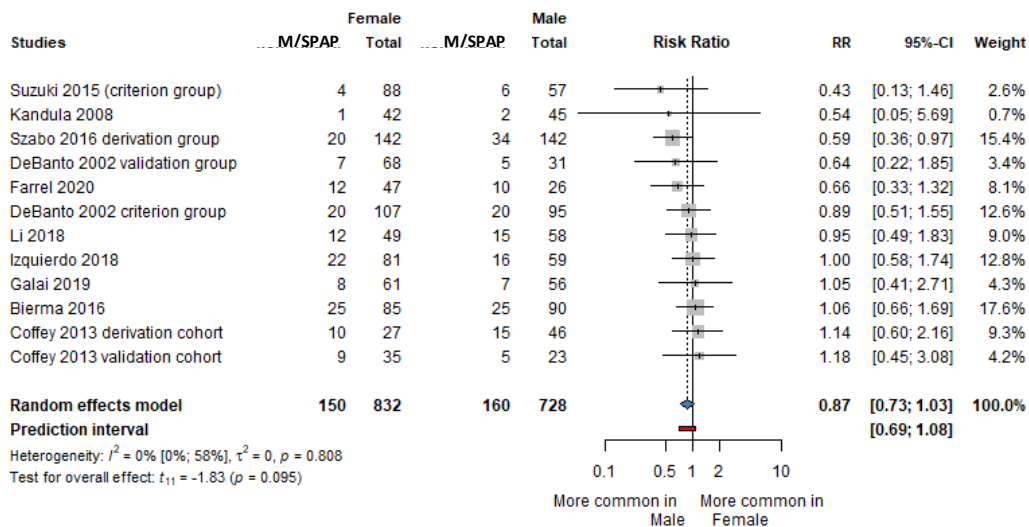

**Supplementary Figure 9** Forest plot for gender in pediatric acute pancreatitis (M/SPAP: moderate or severe pediatric acute pancreatitis; RR: risk ratio; CI: confidence interval)

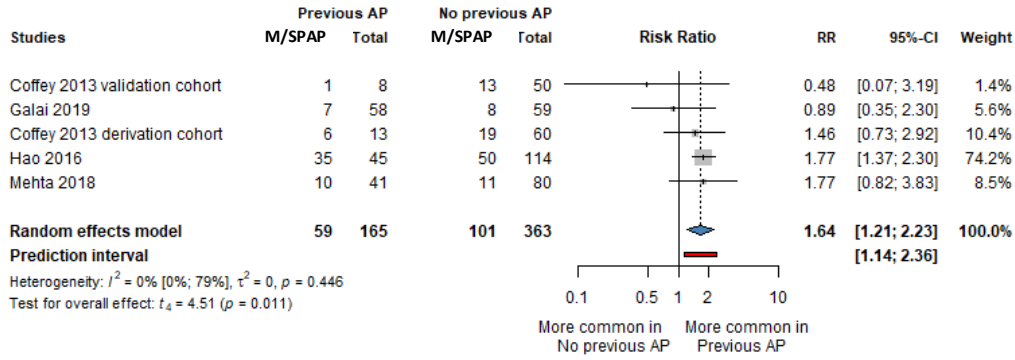

**Supplementary Figure 10** Forest plot for previous acute pancreatitis in pediatric acute pancreatitis (AP: acute pancreatitis; M/SPAP: moderate or severe pediatric acute pancreatitis; RR: risk ratio; CI: confidence interval)

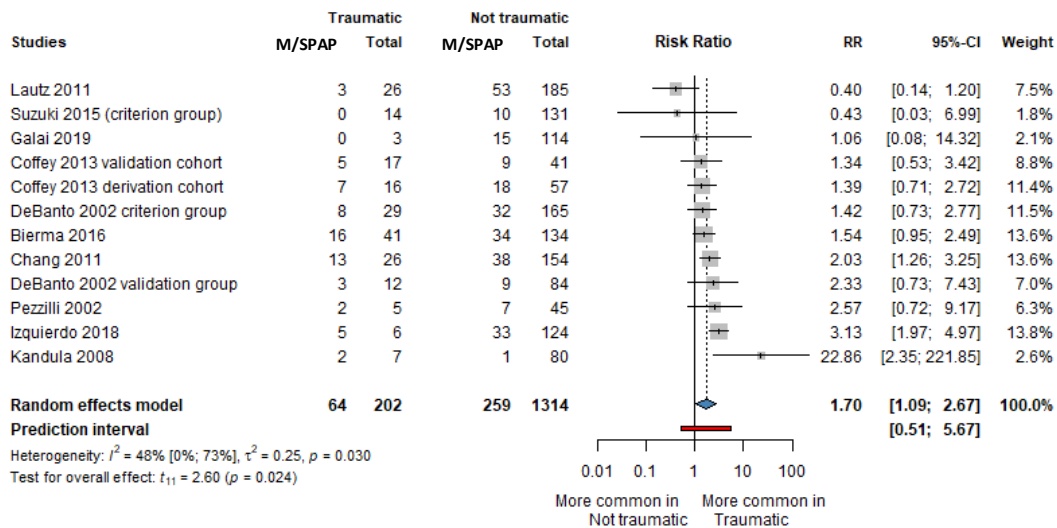

**Supplementary Figure 11** Forest plot for abdominal trauma in pediatric acute pancreatitis (AP: acute pancreatitis; M/SPAP: moderate or severe pediatric acute pancreatitis; RR: risk ratio; CI: confidence interval)

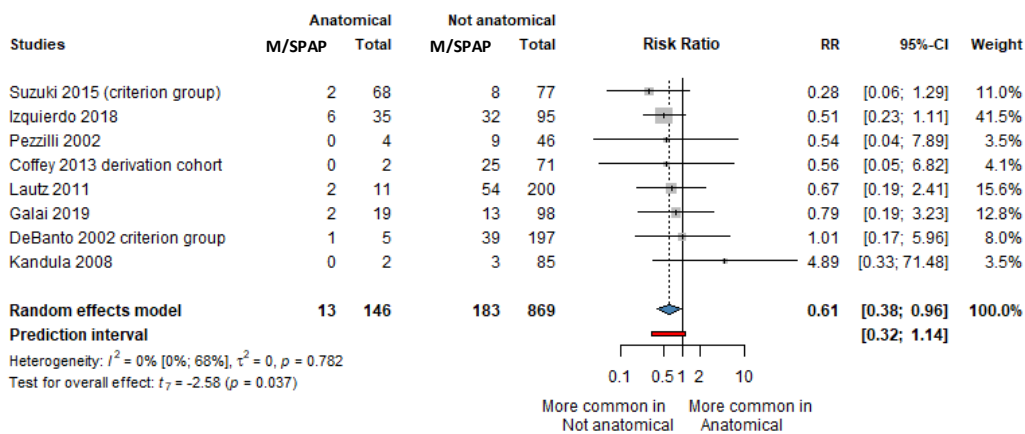

**Supplementary Figure 12** Forest plot for anatomical malformations in pediatric acute pancreatitis (M/SPAP: moderate or severe pediatric acute pancreatitis; RR: risk ratio; CI: confidence interval)

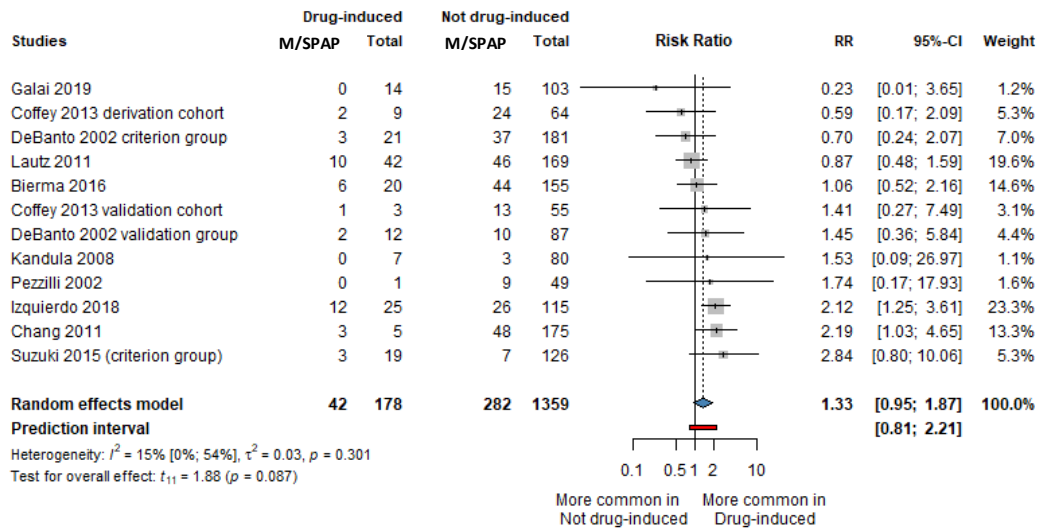

**Supplementary Figure 13** Forest plot for drug-induced pediatric acute pancreatitis (M/SPAP: moderate or severe pediatric acute pancreatitis; RR: risk ratio; CI: confidence interval)

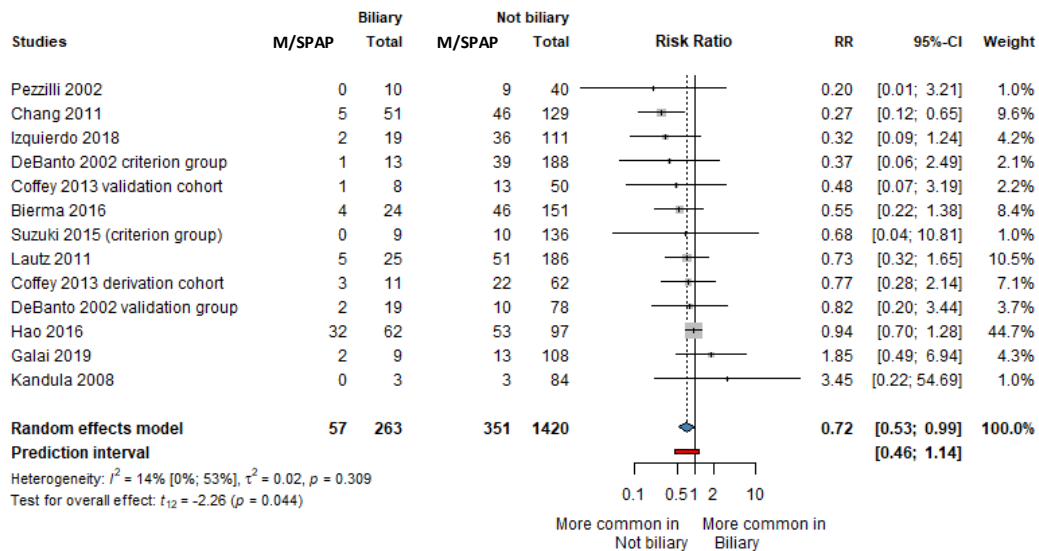

**Supplementary Figure 14** Forest plot for biliary pediatric acute pancreatitis (M/SPAP: moderate or severe pediatric acute pancreatitis; RR: risk ratio; CI: confidence interval)

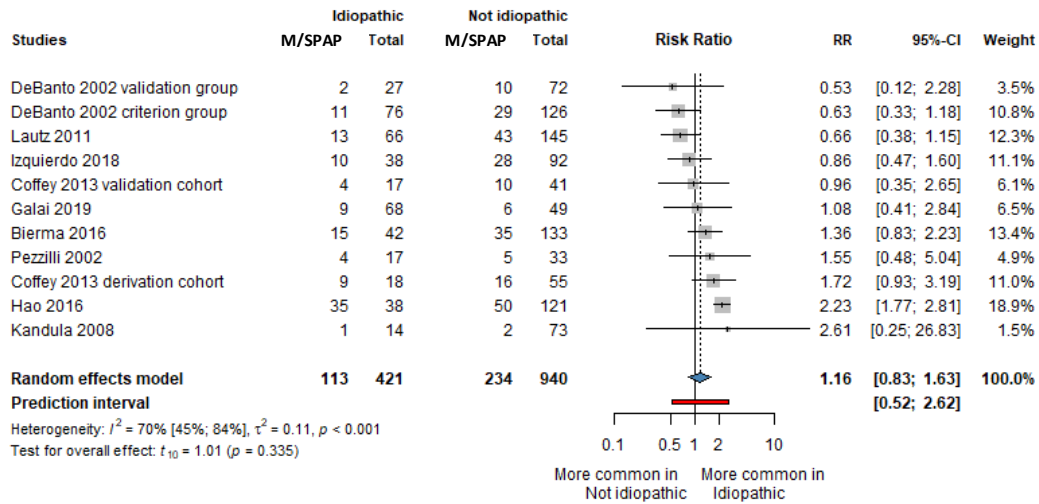

**Supplementary Figure 15** Forest plot for idiopathic pediatric acute pancreatitis (M/SPAP: moderate or severe pediatric acute pancreatitis; RR: risk ratio; CI: confidence interval)

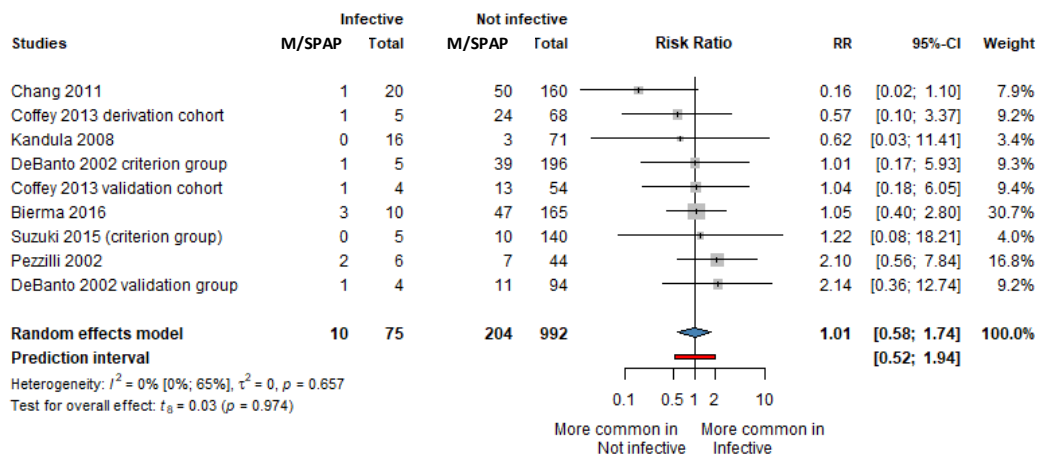

**Supplementary Figure 16** Forest plot for infective pediatric acute pancreatitis (M/SPAP: moderate or severe pediatric acute pancreatitis; RR: risk ratio; CI: confidence interval)



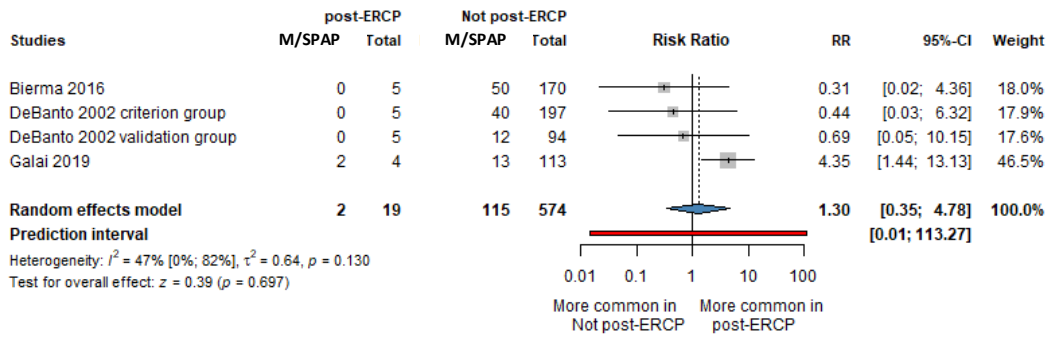

**Supplementary Figure 17** Forest plot for post-ERCP pediatric acute pancreatitis (ERCP: endoscopic retrograde cholangio-pancreatography; M/SPAP: moderate or severe pediatric acute pancreatitis; RR: risk ratio; CI: confidence interval)

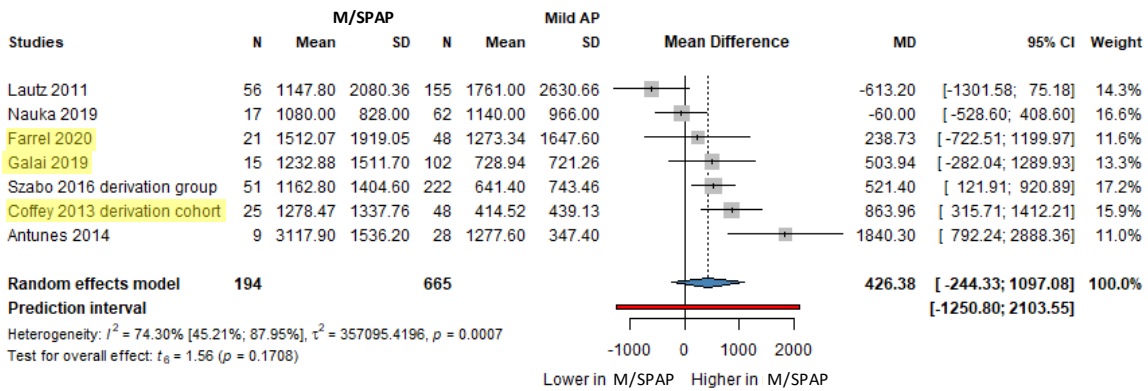

**Supplementary Figure 18** Forest plot for lipase (U/L) levels in pediatric acute pancreatitis. A yellow background indicates that data had to be converted from medians with interquartile ranges to means with SD (AP: acute pancreatitis; M/SPAP: moderate or severe pediatric acute pancreatitis; N: patient number; SD: standard deviation; MD: mean difference; CI: confidence interval)

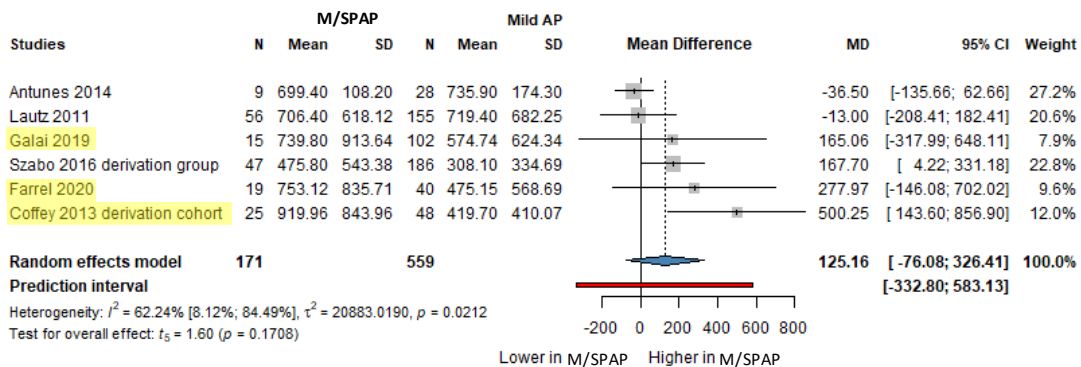

**Supplementary Figure 19** Forest plot for amylase (U/L) levels in pediatric acute pancreatitis. A yellow background indicates that data had to be converted from medians with interquartile ranges to means with SD (AP: acute pancreatitis; M/SPAP: moderate or severe pediatric acute pancreatitis; N: patient number; SD: standard deviation; MD: mean difference; CI: confidence interval)

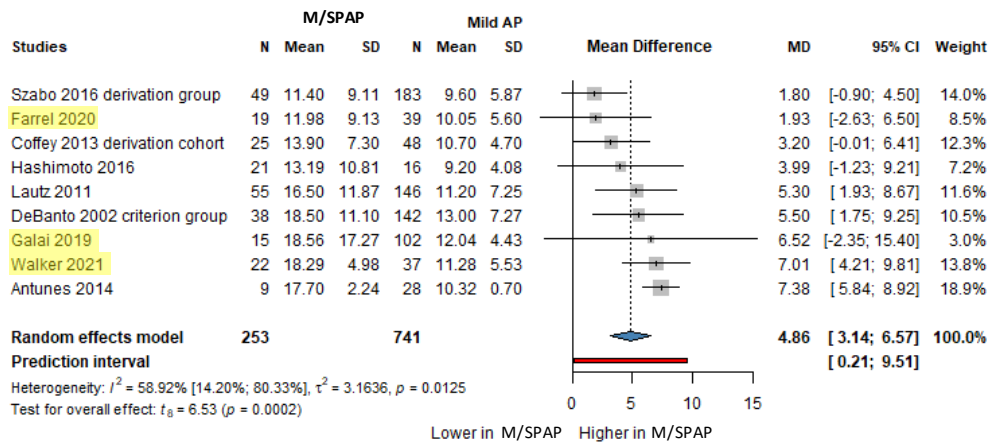

**Supplementary Figure 20** Forest plot for white blood cell count (G/L) in pediatric acute pancreatitis. A yellow background indicates that data had to be converted from medians with interquartile ranges to means with SD (AP: acute pancreatitis; M/SPAP: moderate or severe pediatric acute pancreatitis; N: patient number; SD: standard deviation; MD: mean difference; CI: confidence interval)

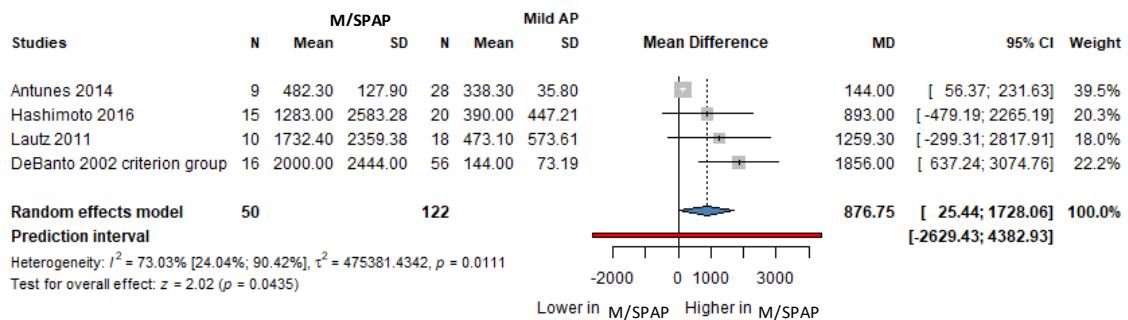

**Supplementary Figure 21** Forest plot for lactate-dehydrogenase (U/L) levels in pediatric acute pancreatitis (AP: acute pancreatitis; M/SPAP: moderate or severe pediatric acute pancreatitis; N: patient number; SD: standard deviation; MD: mean difference; CI: confidence interval)

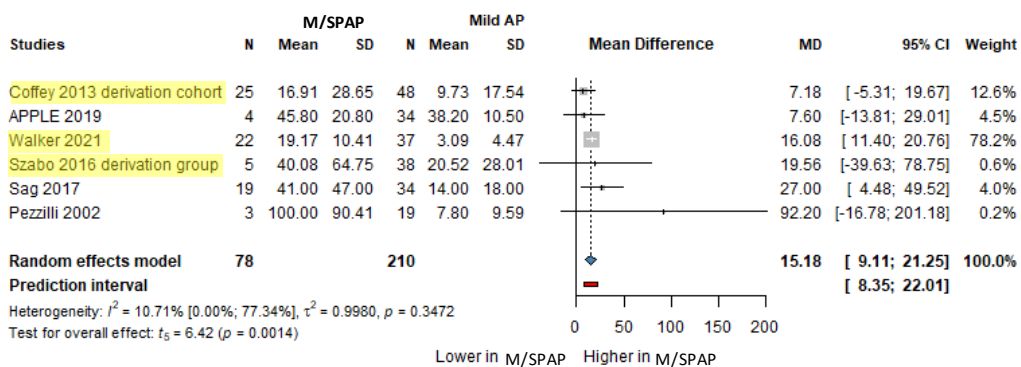

**Supplementary Figure 22** Forest plot for C-reactive protein (mg/L) levels in pediatric acute pancreatitis. A yellow background indicates that data had to be converted from medians with

interquartile ranges to means with SD (AP: acute pancreatitis; M/SPAP: moderate or severe pediatric acute pancreatitis; N: patient number; SD: standard deviation; MD: mean difference; CI: confidence interval)

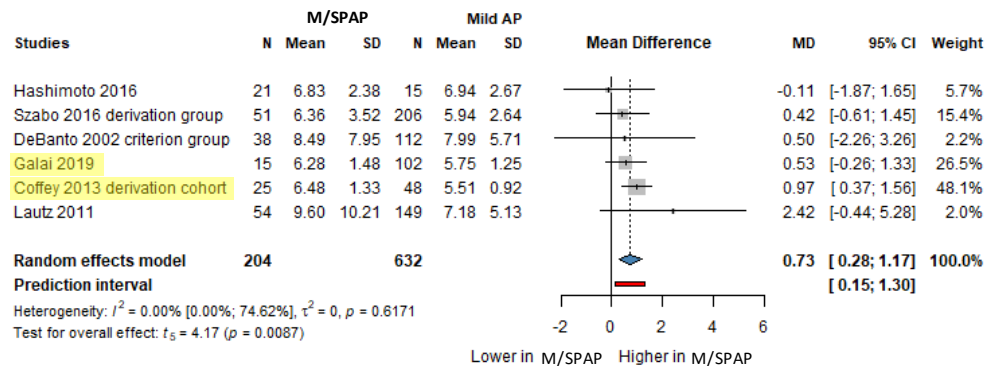

**Supplementary Figure 23** Forest plot for glucose (mM/L) levels in pediatric acute pancreatitis. A yellow background indicates that data had to be converted from medians with interquartile ranges to means with SD (AP: acute pancreatitis; M/SPAP: moderate or severe pediatric acute pancreatitis; N: patient number; SD: standard deviation; MD: mean difference; CI: confidence interval)

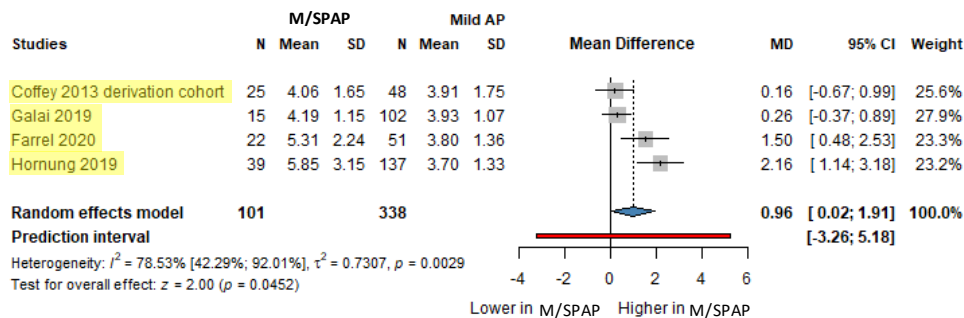

**Supplementary Figure 24** Forest plot for blood urea nitrogen (BUN) (mM/L) levels in pediatric acute pancreatitis. A yellow background indicates that data had to be converted from medians with interquartile ranges to means with SD (AP: acute pancreatitis; M/SPAP: moderate or severe pediatric acute pancreatitis; N: patient number; SD: standard deviation; MD: mean difference; CI: confidence interval)

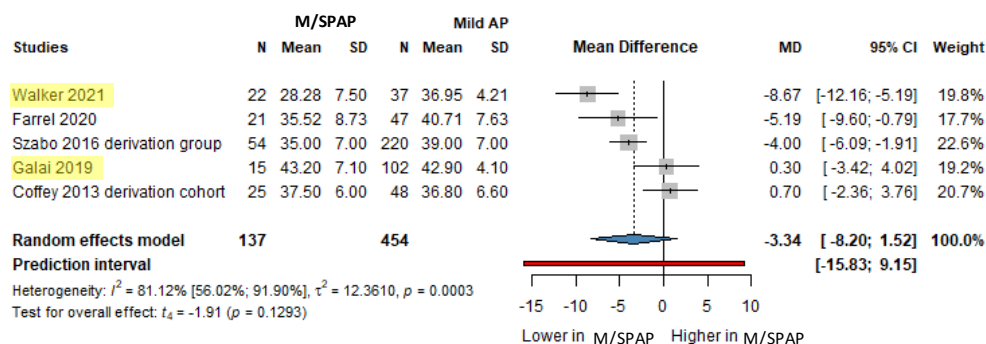

**Supplementary Figure 25** Forest plot for albumin (g/L) levels in pediatric acute pancreatitis. A yellow background indicates that data had to be converted from medians with interquartile ranges to means with SD (AP: acute pancreatitis; M/SPAP: moderate or severe pediatric acute pancreatitis; N: patient number; SD: standard deviation; MD: mean difference; CI: confidence interval)

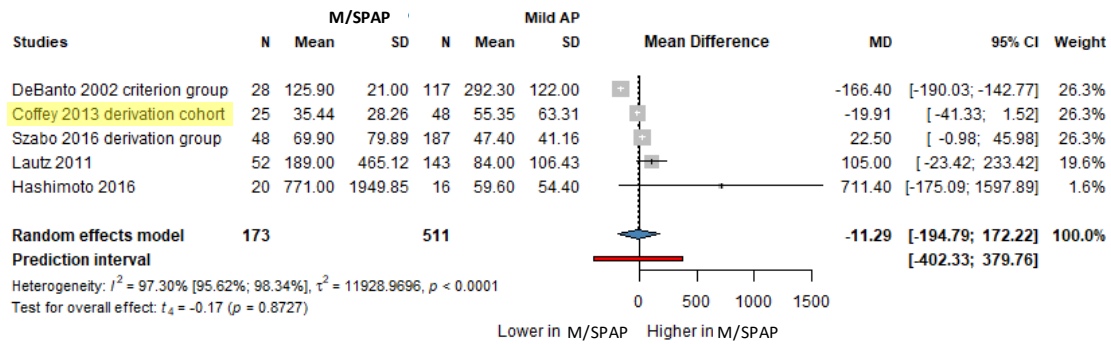

**Supplementary Figure 26** Forest plot for aspartate transaminase (U/L) levels in pediatric acute pancreatitis. A yellow background indicates that data had to be converted from medians with interquartile ranges to means with SD (AP: acute pancreatitis; M/SPAP: moderate or severe pediatric acute pancreatitis; N: patient number; SD: standard deviation; MD: mean difference; CI: confidence interval)

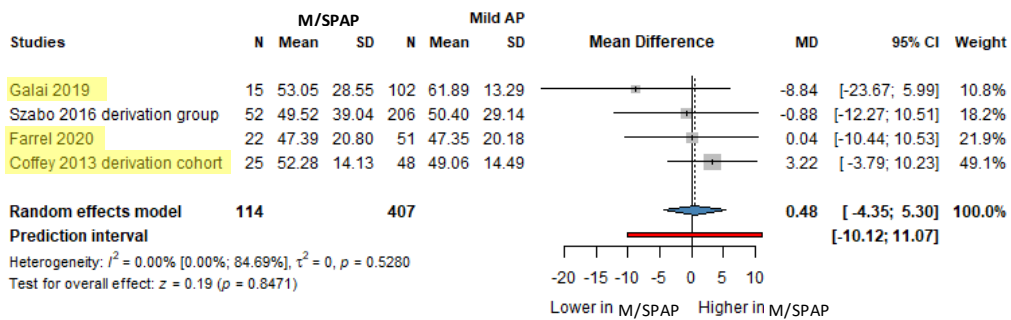

**Supplementary Figure 27** Forest plot for creatinine (uM/L) levels in pediatric acute pancreatitis. A yellow background indicates that data had to be converted from medians with interquartile ranges to means with SD (AP: acute pancreatitis; M/SPAP: moderate or severe pediatric acute pancreatitis; N: patient number; SD: standard deviation; MD: mean difference; CI: confidence interval)

| Outcome                     | Study identifier              | Study participation | Study attrition | Progn factor measurement | Outcome measurement | Study confounding | Statistical analysis reporting | Total assessment |
|-----------------------------|-------------------------------|---------------------|-----------------|--------------------------|---------------------|-------------------|--------------------------------|------------------|
| Age                         | Bierma 2016                   | Low                 | Low             | Low                      | Low                 | Low               | Low                            | Low              |
|                             | Chang 2011                    | Low                 | Low             | Low                      | Low                 | Low               | Low                            | Low              |
|                             | Coffey 2013 derivation cohort | Low                 | Low             | Low                      | Low                 | Low               | Low                            | Low              |
|                             | Coffey 2013 validation cohort | Low                 | Low             | Low                      | Low                 | Low               | Low                            | Low              |
|                             | DeBanto 2002 criterion group  | Low                 | Low             | Low                      | Low                 | Low               | Low                            | Low              |
|                             | DeBanto 2002 validation group | Low                 | Low             | Low                      | Low                 | Low               | Low                            | Low              |
|                             | Farrel 2020                   | Low                 | Low             | Low                      | Low                 | Moderate          | Low                            | Low              |
|                             | Galai 2019                    | Low                 | Low             | Low                      | Low                 | Low               | Low                            | Low              |
|                             | Hashimoto 2016                | Low                 | Low             | Low                      | Low                 | Moderate          | Low                            | Low              |
|                             | Izquierdo 2018                | Low                 | Low             | Low                      | Low                 | Low               | Low                            | Low              |
|                             | Lautz 2011                    | Moderate            | Low             | Low                      | Moderate            | Low               | Low                            | Moderate         |
|                             | Li 2018                       | Low                 | Low             | Low                      | Low                 | Low               | Low                            | Low              |
|                             | Nauka 2019                    | Low                 | Low             | Low                      | Low                 | Low               | Low                            | Low              |
|                             | Suzuki 2015 (criterion group) | Moderate            | Low             | Low                      | Low                 | Low               | Low                            | Low              |
| Szabo 2016 derivation group | Moderate                      | Low                 | Low             | Low                      | Moderate            | Low               | Moderate                       |                  |
| Gender                      | Bierma 2016                   | Low                 | Low             | Low                      | Low                 | Low               | Low                            | Low              |
|                             | Coffey 2013 derivation cohort | Low                 | Low             | Low                      | Low                 | Low               | Low                            | Low              |
|                             | Coffey 2013 validation cohort | Low                 | Low             | Low                      | Low                 | Low               | Low                            | Low              |
|                             | DeBanto 2002 criterion group  | Low                 | Low             | Low                      | Low                 | Low               | Low                            | Low              |
|                             | DeBanto 2002 validation group | Low                 | Low             | Low                      | Low                 | Low               | Low                            | Low              |
|                             | Farrel 2020                   | Low                 | Low             | Low                      | Low                 | Moderate          | Low                            | Low              |
|                             | Galai 2019                    | Low                 | Low             | Low                      | Low                 | Low               | Low                            | Low              |
|                             | Izquierdo 2018                | Low                 | Low             | Low                      | Low                 | Low               | Low                            | Low              |
|                             | Kandula 2008                  | Low                 | Moderate        | Low                      | Low                 | Low               | Low                            | Low              |
|                             | Li 2018                       | Low                 | Low             | Low                      | Low                 | Low               | Low                            | Low              |
|                             | Suzuki 2015 (criterion group) | Moderate            | Low             | Low                      | Low                 | Low               | Low                            | Low              |
|                             | Szabo 2016 derivation group   | Moderate            | Low             | Low                      | Low                 | Moderate          | Low                            | Moderate         |
| Previous AP                 | Coffey 2013 derivation cohort | Low                 | Low             | Moderate                 | Low                 | Low               | Low                            | Low              |
|                             | Coffey 2013 validation cohort | Low                 | Low             | Moderate                 | Low                 | Low               | Low                            | Low              |
|                             | Galai 2019                    | Low                 | Low             | Low                      | Low                 | Low               | Low                            | Low              |
|                             | Hao 2016                      | Moderate            | Low             | Low                      | Low                 | High              | Low                            | High             |
|                             | Mehta 2018                    | Low                 | Low             | Moderate                 | Moderate            | Low               | Low                            | Moderate         |

**Supplementary Figure 28** Results of the risk of bias assessment by the QUIPS tool for age, gender and previous acute pancreatitis (AP)

| Outcome                       | Study identifier              | Study participation | Study attrition | Progn factor measurement | Outcome measurement | Study confounding | Statistical analysis reporting | Total assessment |
|-------------------------------|-------------------------------|---------------------|-----------------|--------------------------|---------------------|-------------------|--------------------------------|------------------|
| Abdominal trauma              | Bierma 2016                   | Low                 | Low             | Moderate                 | Low                 | Low               | Low                            | Low              |
|                               | Chang 2011                    | Low                 | Low             | Moderate                 | Low                 | Low               | Low                            | Low              |
|                               | Coffey 2013 derivation cohort | Low                 | Low             | Moderate                 | Low                 | Low               | Low                            | Low              |
|                               | Coffey 2013 validation cohort | Low                 | Low             | Moderate                 | Low                 | Low               | Low                            | Low              |
|                               | DeBanto 2002 criterion group  | Low                 | Low             | Moderate                 | Low                 | Low               | Low                            | Low              |
|                               | DeBanto 2002 validation group | Low                 | Low             | Moderate                 | Low                 | Low               | Low                            | Low              |
|                               | Galai 2019                    | Low                 | Low             | Moderate                 | Low                 | Low               | Low                            | Low              |
|                               | Izquierdo 2018                | Low                 | Low             | Moderate                 | Low                 | Low               | Low                            | Low              |
|                               | Kandula 2008                  | Low                 | Moderate        | Moderate                 | Low                 | Low               | Low                            | Moderate         |
|                               | Lautz 2011                    | Moderate            | Low             | Moderate                 | Moderate            | Low               | Low                            | Moderate         |
|                               | Pezzilli 2002                 | Moderate            | Low             | Moderate                 | Low                 | Low               | Low                            | Moderate         |
| Suzuki 2015 (criterion group) | Moderate                      | Low                 | Moderate        | Low                      | Low                 | Low               | Moderate                       |                  |
| Anatomical malformation       | Coffey 2013 derivation cohort | Low                 | Low             | Moderate                 | Low                 | Low               | Low                            | Low              |
|                               | Coffey 2013 validation cohort | Low                 | Low             | Moderate                 | Low                 | Low               | Low                            | Low              |
|                               | DeBanto 2002 criterion group  | Low                 | Low             | Moderate                 | Low                 | Low               | Low                            | Low              |
|                               | DeBanto 2002 validation group | Low                 | Low             | Moderate                 | Low                 | Low               | Low                            | Low              |
|                               | Galai 2019                    | Low                 | Low             | Moderate                 | Low                 | Low               | Low                            | Low              |
|                               | Izquierdo 2018                | Low                 | Low             | Moderate                 | Low                 | Low               | Low                            | Low              |
|                               | Kandula 2008                  | Low                 | Moderate        | Moderate                 | Low                 | Low               | Low                            | Moderate         |
|                               | Lautz 2011                    | Moderate            | Low             | Moderate                 | Moderate            | Low               | Low                            | Moderate         |
|                               | Pezzilli 2002                 | Moderate            | Low             | Moderate                 | Low                 | Low               | Low                            | Moderate         |
| Suzuki 2015 (criterion group) | Moderate                      | Low                 | Moderate        | Low                      | Low                 | Low               | Moderate                       |                  |
| Drug-induced AP               | Bierma 2016                   | Low                 | Low             | Moderate                 | Low                 | Low               | Low                            | Low              |
|                               | Chang 2011                    | Low                 | Low             | Moderate                 | Low                 | Low               | Low                            | Low              |
|                               | Coffey 2013 derivation cohort | Low                 | Low             | Moderate                 | Low                 | Low               | Low                            | Low              |
|                               | Coffey 2013 validation cohort | Low                 | Low             | Moderate                 | Low                 | Low               | Low                            | Low              |
|                               | DeBanto 2002 criterion group  | Low                 | Low             | Moderate                 | Low                 | Low               | Low                            | Low              |
|                               | DeBanto 2002 validation group | Low                 | Low             | Moderate                 | Low                 | Low               | Low                            | Low              |
|                               | Galai 2019                    | Low                 | Low             | Moderate                 | Low                 | Low               | Low                            | Low              |
|                               | Izquierdo 2018                | Low                 | Low             | Moderate                 | Low                 | Low               | Low                            | Low              |
|                               | Kandula 2008                  | Low                 | Moderate        | High                     | Low                 | Low               | Low                            | High             |
|                               | Lautz 2011                    | Moderate            | Low             | Moderate                 | Moderate            | Low               | Low                            | Moderate         |
|                               | Pezzilli 2002                 | Moderate            | Low             | Moderate                 | Low                 | Low               | Low                            | Moderate         |
| Suzuki 2015 (criterion group) | Moderate                      | Low                 | Moderate        | Low                      | Low                 | Low               | Moderate                       |                  |
| Biliary AP                    | Bierma 2016                   | Low                 | Low             | Moderate                 | Low                 | Low               | Low                            | Low              |
|                               | Chang 2011                    | Low                 | Low             | Moderate                 | Low                 | Low               | Low                            | Low              |
|                               | Coffey 2013 derivation cohort | Low                 | Low             | Moderate                 | Low                 | Low               | Low                            | Low              |
|                               | Coffey 2013 validation cohort | Low                 | Low             | Moderate                 | Low                 | Low               | Low                            | Low              |
|                               | DeBanto 2002 criterion group  | Low                 | Low             | Moderate                 | Low                 | Low               | Low                            | Low              |
|                               | DeBanto 2002 validation group | Low                 | Low             | Moderate                 | Low                 | Low               | Low                            | Low              |
|                               | Galai 2019                    | Low                 | Low             | Moderate                 | Low                 | Low               | Low                            | Low              |
|                               | Hao 2016                      | Moderate            | Low             | Moderate                 | Low                 | High              | Low                            | High             |
|                               | Izquierdo 2018                | Low                 | Low             | Moderate                 | Low                 | Low               | Low                            | Low              |
|                               | Kandula 2008                  | Low                 | Moderate        | Moderate                 | Low                 | Low               | Low                            | Moderate         |
|                               | Lautz 2011                    | Moderate            | Low             | Moderate                 | Moderate            | Low               | Low                            | Moderate         |
|                               | Pezzilli 2002                 | Moderate            | Low             | Moderate                 | Low                 | Low               | Low                            | Moderate         |
| Suzuki 2015 (criterion group) | Moderate                      | Low                 | Moderate        | Low                      | Low                 | Low               | Moderate                       |                  |
| Idiopathic AP                 | Bierma 2016                   | Low                 | Low             | Moderate                 | Low                 | Low               | Low                            | Low              |
|                               | Coffey 2013 derivation cohort | Low                 | Low             | Moderate                 | Low                 | Low               | Low                            | Low              |
|                               | Coffey 2013 validation cohort | Low                 | Low             | Moderate                 | Low                 | Low               | Low                            | Low              |
|                               | DeBanto 2002 criterion group  | Low                 | Low             | Moderate                 | Low                 | Low               | Low                            | Low              |
|                               | DeBanto 2002 validation group | Low                 | Low             | Moderate                 | Low                 | Low               | Low                            | Low              |
|                               | Galai 2019                    | Low                 | Low             | Moderate                 | Low                 | Low               | Low                            | Low              |
|                               | Hao 2016                      | Moderate            | Low             | Moderate                 | Low                 | High              | Low                            | High             |
|                               | Izquierdo 2018                | Low                 | Low             | Moderate                 | Low                 | Low               | Low                            | Low              |
|                               | Kandula 2008                  | Low                 | Moderate        | Moderate                 | Low                 | Low               | Low                            | Moderate         |
|                               | Lautz 2011                    | Moderate            | Low             | Moderate                 | Moderate            | Low               | Low                            | Moderate         |
|                               | Pezzilli 2002                 | Moderate            | Low             | Moderate                 | Low                 | Low               | Low                            | Moderate         |
| Infective etiology            | Bierma 2016                   | Low                 | Low             | Moderate                 | Low                 | Low               | Low                            | Low              |
|                               | Chang 2011                    | Low                 | Low             | Moderate                 | Low                 | Low               | Low                            | Low              |
|                               | Coffey 2013 derivation cohort | Low                 | Low             | Moderate                 | Low                 | Low               | Low                            | Low              |
|                               | Coffey 2013 validation cohort | Low                 | Low             | Moderate                 | Low                 | Low               | Low                            | Low              |
|                               | DeBanto 2002 criterion group  | Low                 | Low             | Moderate                 | Low                 | Low               | Low                            | Low              |
|                               | DeBanto 2002 validation group | Low                 | Low             | Moderate                 | Low                 | Low               | Low                            | Low              |
|                               | Kandula 2008                  | Low                 | Moderate        | Moderate                 | Low                 | Low               | Low                            | Moderate         |
|                               | Pezzilli 2002                 | Moderate            | Low             | Moderate                 | Low                 | Low               | Low                            | Moderate         |
|                               | Suzuki 2015 (criterion group) | Moderate            | Low             | Moderate                 | Low                 | Low               | Low                            | Moderate         |
| Post-ERCP AP                  | Bierma 2016                   | Low                 | Low             | Moderate                 | Low                 | Low               | Low                            | Low              |
|                               | DeBanto 2002 criterion group  | Low                 | Low             | Moderate                 | Low                 | Low               | Low                            | Low              |
|                               | DeBanto 2002 validation group | Low                 | Low             | Moderate                 | Low                 | Low               | Low                            | Low              |
|                               | Galai 2019                    | Low                 | Low             | Moderate                 | Low                 | Low               | Low                            | Low              |



**Supplementary Figure 29** Results of the risk of bias assessment by the QUIPS tool for etiological factors (AP: acute pancreatitis)

| Outcome                | Study identifier              | Study participation | Study attrition | Progn factor measurement | Outcome measurement | Study confounding | Statistical analysis reporting | Total assessment |
|------------------------|-------------------------------|---------------------|-----------------|--------------------------|---------------------|-------------------|--------------------------------|------------------|
| Lipase                 | Antunes 2014                  | Moderate            | Low             | Low                      | Moderate            | Low               | Low                            | Moderate         |
|                        | Coffey 2013 derivation cohort | Low                 | Low             | Low                      | Low                 | Low               | Low                            | Low              |
|                        | Farrel 2020                   | Low                 | Low             | Low                      | Low                 | Moderate          | Low                            | Low              |
|                        | Galai 2019                    | Low                 | Low             | Low                      | Low                 | Low               | Low                            | Low              |
|                        | Lautz 2011                    | Moderate            | Low             | Low                      | Moderate            | Low               | Low                            | Moderate         |
|                        | Nauka 2019                    | Low                 | Low             | Low                      | Low                 | Low               | Low                            | Low              |
|                        | Szabo 2016 derivation group   | Moderate            | Low             | Low                      | Low                 | Moderate          | Low                            | Moderate         |
| Amylase                | Antunes 2014                  | Moderate            | Low             | Low                      | Moderate            | Low               | Low                            | Moderate         |
|                        | Coffey 2013 derivation cohort | Low                 | Low             | Low                      | Low                 | Low               | Low                            | Low              |
|                        | Farrel 2020                   | Low                 | Low             | Moderate                 | Low                 | Moderate          | Low                            | Moderate         |
|                        | Galai 2019                    | Low                 | Low             | Low                      | Low                 | Low               | Low                            | Low              |
|                        | Lautz 2011                    | Moderate            | Low             | Low                      | Moderate            | Low               | Low                            | Moderate         |
|                        | Szabo 2016 derivation group   | Moderate            | Low             | Moderate                 | Low                 | Moderate          | Low                            | Moderate         |
| White blood cell count | Antunes 2014                  | Moderate            | Low             | Low                      | Moderate            | Low               | Low                            | Moderate         |
|                        | Coffey 2013 derivation cohort | Low                 | Low             | Low                      | Low                 | Low               | Low                            | Low              |
|                        | DeBanto 2002 criterion group  | Low                 | Low             | Low                      | Low                 | Low               | Low                            | Low              |
|                        | Farrel 2020                   | Low                 | Low             | Moderate                 | Low                 | Moderate          | Low                            | Moderate         |
|                        | Galai 2019                    | Low                 | Low             | Low                      | Low                 | Low               | Low                            | Low              |
|                        | Hashimoto 2016                | Low                 | Low             | Low                      | Low                 | Moderate          | Low                            | Low              |
|                        | Lautz 2011                    | Moderate            | Low             | Low                      | Moderate            | Low               | Low                            | Moderate         |
|                        | Szabo 2016 derivation group   | Moderate            | Low             | Moderate                 | Low                 | Moderate          | Low                            | Moderate         |
|                        | Walker 2021                   | Low                 | Low             | Low                      | Low                 | Low               | Low                            | Low              |
| Lactate-dehydrogenase  | Antunes 2014                  | Moderate            | Low             | Low                      | Moderate            | Low               | Low                            | Moderate         |
|                        | DeBanto 2002 criterion group  | Low                 | Low             | High                     | Low                 | Low               | Low                            | Moderate         |
|                        | Hashimoto 2016                | Low                 | Low             | Low                      | Low                 | Moderate          | Low                            | Low              |
|                        | Lautz 2011                    | Moderate            | Low             | High                     | Moderate            | Low               | Low                            | High             |
| C-reactive protein     | Coffey 2013 derivation cohort | Low                 | Low             | Low                      | Low                 | Low               | Low                            | Low              |
|                        | APPLE 2019                    | Low                 | Low             | Low                      | Low                 | Moderate          | Low                            | Low              |
|                        | Pezzilli 2002                 | Moderate            | Low             | High                     | Low                 | Low               | Low                            | High             |
|                        | Sag 2017                      | Low                 | Low             | Moderate                 | Low                 | Low               | Low                            | Low              |
|                        | Szabo 2016 derivation group   | Moderate            | Low             | High                     | Low                 | Moderate          | Low                            | High             |
|                        | Walker 2021                   | Low                 | Low             | Low                      | Low                 | Low               | Low                            | Low              |
|                        | Coffey 2013 derivation cohort | Low                 | Low             | Moderate                 | Low                 | Low               | Low                            | Low              |
| Glucose                | DeBanto 2002 criterion group  | Low                 | Low             | Moderate                 | Low                 | Low               | Low                            | Low              |
|                        | Galai 2019                    | Low                 | Low             | Moderate                 | Low                 | Low               | Low                            | Low              |
|                        | Hashimoto 2016                | Low                 | Low             | Low                      | Low                 | Moderate          | Low                            | Low              |
|                        | Lautz 2011                    | Moderate            | Low             | Low                      | Moderate            | Low               | Low                            | Moderate         |
|                        | Szabo 2016 derivation group   | Moderate            | Low             | Moderate                 | Low                 | Moderate          | Low                            | Moderate         |
| Blood urea nitrogen    | Coffey 2013 derivation cohort | Low                 | Low             | Moderate                 | Low                 | Low               | Low                            | Low              |
|                        | Farrel 2020                   | Low                 | Low             | Low                      | Low                 | Moderate          | Low                            | Low              |
|                        | Galai 2019                    | Low                 | Low             | Moderate                 | Low                 | Low               | Low                            | Low              |
|                        | Hornung 2019                  | Moderate            | Low             | Low                      | Low                 | Moderate          | Low                            | Moderate         |
| Albumin                | Coffey 2013 derivation cohort | Low                 | Low             | Moderate                 | Low                 | Low               | Low                            | Low              |
|                        | Farrel 2020                   | Low                 | Low             | Moderate                 | Low                 | Moderate          | Low                            | Moderate         |
|                        | Galai 2019                    | Low                 | Low             | Moderate                 | Low                 | Low               | Low                            | Low              |
|                        | Szabo 2016 derivation group   | Moderate            | Low             | Low                      | Low                 | Moderate          | Low                            | Moderate         |
|                        | Walker 2021                   | Low                 | Low             | Moderate                 | Low                 | Low               | Low                            | Low              |
| Aspartate transaminase | Coffey 2013 derivation cohort | Low                 | Low             | Moderate                 | Low                 | Low               | Low                            | Low              |
|                        | DeBanto 2002 criterion group  | Low                 | Low             | Moderate                 | Low                 | Low               | Low                            | Low              |
|                        | Hashimoto 2016                | Low                 | Low             | Low                      | Low                 | Moderate          | Low                            | Low              |
|                        | Lautz 2011                    | Moderate            | Low             | Low                      | Moderate            | Low               | Low                            | Moderate         |
|                        | Szabo 2016 derivation group   | Moderate            | Low             | Moderate                 | Low                 | Moderate          | Low                            | Moderate         |
| Creatinine             | Coffey 2013 derivation cohort | Low                 | Low             | Moderate                 | Low                 | Low               | Low                            | Low              |
|                        | Farrel 2020                   | Low                 | Low             | Low                      | Low                 | Moderate          | Low                            | Low              |
|                        | Galai 2019                    | Low                 | Low             | Moderate                 | Low                 | Low               | Low                            | Low              |
|                        | Szabo 2016 derivation group   | Moderate            | Low             | Moderate                 | Low                 | Moderate          | Low                            | Moderate         |

**Supplementary Figure 30** Results of the risk of bias assessment by the QUIPS tool for on-admission laboratory parameters

| Study identifier              | Citation(s) of report(s) | Study identifier             | Citation(s) of report(s) |
|-------------------------------|--------------------------|------------------------------|--------------------------|
| Abu-El-Hajja 2020             | (1, 2)                   | Izquierdo 2018               | (3)                      |
| Antunes 2014                  | (4, 5)                   | Kandula 2008                 | (6)                      |
| Berney 1996                   | (7)                      | Kaur 2018                    | (8)                      |
| Bierma 2016                   | (9, 10)                  | APPLE 2019                   | (11-16)                  |
| Birimberg-Schwartz 2021       | (17)                     | Lautz 2011                   | (18, 19)                 |
| Boskovic 2014                 | (20)                     | Li 2018                      | (21)                     |
| Chang 2011                    | (22)                     | Mehta 2018                   | (23)                     |
| Coffey 2013 derivation cohort | (24-26)                  | Nauka 2019                   | (27, 28)                 |
| Coffey 2013 validation cohort |                          | Orkin 2017                   | (29)                     |
| DeBanto 2002 criterion group  | (30)                     | Parian 2019                  | (31)                     |
| DeBanto 2002 validation group |                          | Pezzili 2002                 | (32)                     |
| Fabre 2012                    | (33, 34)                 | Sag 2017                     | (35)                     |
| Farrel 2020                   | (36-40)                  | Sánchez-Ramírez 2007         | (41)                     |
| Farrel 2021 derivation cohort | (42, 43)                 | Suzuki 2015 criterion group  | (44, 45)                 |
| Farrel 2021 validation cohort |                          | Suzuki 2017 validation group | (46)                     |
| Fonseca Sepilveda 2019        | (47)                     | Szabo 2016 derivation group  | (48, 49)                 |
| Galai 2019                    | (50, 51)                 | Szabo 2016 validation group  |                          |
| Guerrero-Lozano 2017          | (52)                     | Thavamani 2021               | (53-55)                  |
| Hao 2016                      | (56)                     | Vitale 2019                  | (57, 58)                 |
| Hashimoto 2016                | (59)                     | Walker 2021                  | (60, 61)                 |
| Hornung 2019                  | (62)                     | Wetherill 2013               | (63-65)                  |
| Izquierdo 2018                | (66, 67)                 | Zheng 2018                   | (68)                     |

**Supplementary Table 1: Citations of study reports.** Study identifiers are presented as in Table 1 and citations of corresponding reports are listed.

## REFERENCES

1. Abu-El-Hajja M, Hornung L, Lin TK, Nathan JD, Thompson T, Vitale DS, et al. DRUG-INDUCED PANCREATITIS IS THE LEADING RISK FACTOR FOR FIRST ATTACK OF ACUTE PANCREATITIS IN CHILDREN. *Gastroenterology*. 2020;158(6):S-589-S-90.
2. Abu-El-Hajja M, Hornung L, Lin TK, Nathan JD, Thompson T, Vitale DS, et al. Drug induced pancreatitis is the leading known cause of first attack acute pancreatitis in children. *Pancreatology*. 2020;20(6):1103-8.
3. Izquierdo YE, Fonseca EV, Moreno L, Montoya RD, Guerrero R. Multivariate Model for the Prediction of Severity of Acute Pancreatitis in Children. *J Pediatr Gastroenterol Nutr*. 2018;66(6):949-52.
4. Antunes H, Nascimento J, Mesquita A, Correia-Pinto J. Acute pancreatitis in children: a tertiary hospital report. *Scand J Gastroenterol*. 2014;49(5):642-7.
5. Ferreira C, Estrada A, Correia-Pinto J, Antunes H. Acute pancreatitis in children: Spectrum of disease and predictors of severity. *Journal of Pediatric Gastroenterology and Nutrition*. 2016;63:S410.
6. Kandula L, Lowe ME. Etiology and outcome of acute pancreatitis in infants and toddlers. *J Pediatr*. 2008;152(1):106-10, 10.e1.
7. Berney T, Belli D, Bugmann P, Beghetti M, Morel P, LeCoultré C. Influence of severe underlying pathology and hypovolemic shock on the development of acute pancreatitis in children. *J Pediatr Surg*. 1996;31(9):1256-61.
8. Kaur J, Wadhwa N, Jeena S. Classifying pediatric acute pancreatitis into mild, moderately severe and severe! *Journal of Pediatric Gastroenterology and Nutrition*. 2018;66:242.
9. Bierma M, Coffey MJ, Nightingale S, Van Rheeën P, Ooi CY. Predicting severe acute pancreatitis in children based on serum lipase and calcium: A multicentre retrospective cohort study. *Gastroenterology*. 2016;150(4):S711.
10. Bierma MJ, Coffey MJ, Nightingale S, van Rheeën PF, Ooi CY. Predicting severe acute pancreatitis in children based on serum lipase and calcium: A multicentre retrospective cohort study. *Pancreatology*. 2016;16(4):529-34.
11. Lásztity N, Mosztbacher D, Juhász FM, Kaán K, Tokodi I, Tészás A, et al. Clinical signs of severity and therapeutic intervention in pediatric acute pancreatitis-data from APPLE multicentre, observational clinical trial. *Journal of Pediatric Gastroenterology and Nutrition*. 2019;68:212.
12. Lasztity N, Mosztbacher D, Toth AZ, Demcsak A, Tokodi I, Czelecz J, et al. Clinical signs of severity and therapeutic intervention in pediatric acute pancreatitis e prospective multicenter nationwide cohort. *Pancreatology*. 2018;18(4):S20-S1.
13. Martonosi AR, Mosztbacher D, Juhász MF, Tokodi I, Tészás A, Gárdos L, et al. Diabetic ketoacidosis worsen the outcome of AP in childhood – preliminary results of APPLE (Analysis of



- Pediatric Pancreatitis) prospective, multicentric, observational clinical trial. *Pancreatology*. 2019;19:S90-S1.
14. Parniczky A, Lásztity N, Mosztbacher D, Tóth A, Szucs D, Vass N, et al. Pediatric pancreatitis. Multicentre prospective data collection and analysis by the Hungarian Pancreatic Study Group. *Pancreatology*. 2015;15(3):S65.
  15. Párniczky A, Németh BC, Mosztbacher D, Szentesi A, Abu-el Haija M, Pienar C, et al. Explore the childhood onset pancreatitis with the support of APPLE (analysis of pediatric pancreatitis) multicenter, observational, clinical trial. *Journal of Pediatric Gastroenterology and Nutrition*. 2019;68:223-4.
  16. Párniczky A, Németh BC, Mosztbacher D, Tóth AZ, Lásztity N, Abu-El-Haija M, et al. Explore the childhood onset pancreatitis with the support of APPLE (Analysis of Pediatric Pancreatitis) multicenter, observational, clinical trial. *Pancreas*. 2019;48(10):1506.
  17. Birimberg-Schwartz L, Rajiwate S, Dupuis A, Gonska T. Pediatric Acute Pancreatitis: Changes in Management and Disease Outcomes Over 16 Years. *Pancreas*. 2021;50(3):341-6.
  18. Lautz TB, Chin AC, Radhakrishnan J. Acute pancreatitis in children: spectrum of disease and predictors of severity. *J Pediatr Surg*. 2011;46(6):1144-9.
  19. Lautz TB, Turkel G, Radhakrishnan J, Wyers M, Chin AC. Utility of the computed tomography severity index (Balthazar score) in children with acute pancreatitis. *J Pediatr Surg*. 2012;47(6):1185-91.
  20. Boskovic A, Pasic S, Soldatovic I, Milinic N, Stankovic I. The role of D-dimer in prediction of the course and outcome in pediatric acute pancreatitis. *Pancreatology*. 2014;14(5):330-4.
  21. Li W, Luo S, Zhu Y, Shu M, Wen Y, Wang Z, et al. Concordance of the Balthazar Grade and the Revised Atlanta Classification: Proposing a Modified Balthazar Grade to Predict the Severity of Acute Pancreatitis in Pediatric Population. *Pancreas*. 2018;47(10):1312-6.
  22. Chang YJ, Chao HC, Kong MS, Hsia SH, Lai MW, Yan DC. Acute pancreatitis in children. *Acta Paediatr*. 2011;100(5):740-4.
  23. Mehta M, Baldwin C, Sathe M, Troendle D. Severe pancreatitis is rare in pediatric patients: Results from a retrospective review. *Journal of Pediatric Gastroenterology and Nutrition*. 2018;67:S255.
  24. Coffey MJ, Ooi CY. Can serum pancreatic enzyme levels predict severity of acute pediatric pancreatitis? *Pancreatology*. 2011;11(6):570-1.
  25. Coffey MJ, Nightingale S, Ooi CY. Early prediction of severity in acute pediatric pancreatitis. *Gastroenterology*. 2012;142(5):S848.
  26. Coffey MJ, Nightingale S, Ooi CY. Serum lipase as an early predictor of severity in pediatric acute pancreatitis. *J Pediatr Gastroenterol Nutr*. 2013;56(6):602-8.
  27. Nauka PC, Dolinger MT, Kohn N, Miller JM, Bitton S, Weinstein T, et al. SIRS is a Prognostic Indicator for Pediatric Severe Acute Pancreatitis: A Retrospective Analysis. *Gastroenterology*. 2018;154(6):S-710-S-1.
  28. Nauka PC, Weinstein TA, Dolinger MT, Miller JM, Kohn N, Bitton S, et al. Validation of Lipase and Systemic Inflammatory Response Syndrome as Prognostic Indicators in Pediatric Acute Pancreatitis: A Retrospective Analysis. *J Pediatr Gastroenterol Nutr*. 2019;68(3):389-93.
  29. Orkin SH, Lin TK, Fei L, Nathan JD, Thompson T, Abu-El-Haija M. Serum amylase and lipase patterns in pediatric acute pancreatitis diagnosis: Is serum amylase really needed? *Gastroenterology*. 2017;152(5):S435.
  30. DeBanto JR, Goday PS, Pedroso MR, Iftikhar R, Fazel A, Nayyar S, et al. Acute pancreatitis in children. *Am J Gastroenterol*. 2002;97(7):1726-31.
  31. Parian E, Tan M, Urtula R, Nolasco ME. Clinical profile and outcome of acute pancreatitis in children admitted in Philippine children's medical center. *Gut*. 2019;68:A15.
  32. Pezzilli R, Morselli-Labate AM, Castellano E, Barbera C, Corrao S, Di Prima L, et al. Acute pancreatitis in children. An Italian multicentre study. *Dig Liver Dis*. 2002;34(5):343-8.
  33. Fabre A, Petit P, Gaudart J, Mas E, Vial J, Olives J, et al. Assessment of the interest of gravity score in acute pancreatitis of children. *Journal of Pediatric Gastroenterology and Nutrition*. 2009;48:E57-E8.
  34. Fabre A, Petit P, Gaudart J, Mas E, Vial J, Olives JP, et al. Severity scores in children with acute pancreatitis. *J Pediatr Gastroenterol Nutr*. 2012;55(3):266-7.

35. Sag E, Akbulut UE, Comert HSY, Ozdogan EB, Karahan SC, Cakir M. Acute pancreatitis in children: Single center experience over 10-year period. *Journal of Pediatric Gastroenterology and Nutrition*. 2017;64:251.
36. Farrell PR, Hornung L, Farmer P, DesPain AW, Kim E, Pearman R, et al. Who's at Risk? A Prognostic Model for Severity Prediction in Pediatric Acute Pancreatitis. *J Pediatr Gastroenterol Nutr*. 2020;71(4):536-42.
37. Farrell P, Hornung L, Farmer P, DesPain A, Kim E, Pearman R, et al. Who's at risk? A prognostic model for severity prediction in pediatric acute pancreatitis. *Journal of Pediatric Gastroenterology and Nutrition*. 2019;69.
38. Farrell P, Hornung L, Farmer P, Serrette A, Lin T, Nathan J, et al. Bun change from admission and levels at 24-48 hours are significant predictors of severity in pediatric acute pancreatitis. *Journal of Pediatric Gastroenterology and Nutrition*. 2019;69.
39. Farrell PR, Hornung L, Farmer PF, DesPain AW, Kim E, Pearman R, et al. VALIDATION AND OPTIMIZATION OF AN EARLY PREDICTOR MODEL FOR PEDIATRIC ACUTE PANCREATITIS. *Gastroenterology*. 2019;156(6):S-342.
40. Farrell P, Serrette A, Farmer P. Bun levels: A marker for severity in pediatric acute pancreatitis? *Journal of Pediatric Gastroenterology and Nutrition*. 2017;65:S329-S30.
41. Sánchez-Ramírez CA, Larrosa-Haro A, Flores-Martínez S, Sánchez-Corona J, Villa-Gómez A, Macías-Rosales R. Acute and recurrent pancreatitis in children: etiological factors. *Acta Paediatr*. 2007;96(4):534-7.
42. Farrell PR, Jones EK, Hornung L, Thompson T, Patel J, Lin TK, et al. Cytokine Profile Elevations on Admission Can Determine Risks of Severe Acute Pancreatitis in Children. *J Pediatr*. 2021;238:33-41.e4.
43. Farrell PR, Jones EK, Hornung L, Thompson T, Patel J, Lin TK, et al. USE OF NOVEL CYTOPLEX ASSAY TO DETERMINE PREDICTORS OF SEVERITY IN PEDIATRIC ACUTE PANCREATITIS. *Gastroenterology*. 2020;158(6):S-607.
44. Suzuki M, Saito N, Naritaka N, Nakano S, Minowa K, Honda Y, et al. Scoring system for the prediction of severe acute pancreatitis in children. *Pediatr Int*. 2015;57(1):113-8.
45. Suzuki M, Fujii T, Takahiro K, Ohtsuka Y, Nagata S, Shimizu T. Scoring system for the severity of acute pancreatitis in children. *Pancreas*. 2008;37(2):222-3.
46. Suzuki M, Saito N, Minowa K, Kagimoto S, Shimizu T. Validation of severity assessment for acute pancreatitis in children. *Pediatr Int*. 2017;59(10):1127-8.
47. Fonseca Sepúlveda EV, Guerrero-Lozano R. Acute pancreatitis and recurrent acute pancreatitis: an exploration of clinical and etiologic factors and outcomes. *J Pediatr (Rio J)*. 2019;95(6):713-9.
48. Szabo FK, Hornung L, Oparaji JA, Alhosh R, Husain SZ, Liu QY, et al. A prognostic tool to predict severe acute pancreatitis in pediatrics. *Pancreatol*. 2016;16(3):358-64.
49. Szabo FK, Hornung L, Fei L, Palermo JJ, Lin TK, Nathan JD, et al. Early predictors of severe pancreatitis in children. *Gastroenterology*. 2015;148(4):S682.
50. Galai T, Cohen S, Yerushalmy-Feler A, Weintraub Y, Moran-Lev H, Amir AZ. Young Age Predicts Acute Pancreatitis Severity in Children. *J Pediatr Gastroenterol Nutr*. 2019;68(5):720-6.
51. Galai T, Cohen S, Feler AY, Weintraub Y, Weiner D, Amir A. Amylase, lipase and white blood cell count at presentation are predictors of severity of acute pancreatitis in children. *Journal of Pediatric Gastroenterology and Nutrition*. 2017;64:246.
52. Guerrero-Lozano R, Izquierdo Y, Fonseca V, Moreno LA, Montoya R. Utility of tomographic classifications in predicting unfavorable outcomes in children with acute pancreatitis. *Journal of Pediatric Gastroenterology and Nutrition*. 2017;65:S333-S4.
53. Thavamani A, Umaphathi KK, Sferra TJ, Sankararaman S. Undernutrition and obesity are associated with adverse clinical outcomes in hospitalized children and adolescents with acute pancreatitis. *Nutrients*. 2021;13(1):1-10.
54. Thavamani A, Umaphathi K, Sferra T, Sankararaman S. Nutritional status adversely predicts the severity of acute pancreatitis in hospitalized pediatric patients. *Journal of Parenteral and Enteral Nutrition*. 2021;45(SUPPL 1):S184-S7.
55. Thavamani A, Umaphathi KK, Roy A, Krishna SG. The increasing prevalence and adverse impact of morbid obesity in pediatric acute pancreatitis. *Pediatr Obes*. 2020;15(8):e12643.

56. Hao F, Guo H, Luo Q, Guo C. Disease progression of acute pancreatitis in pediatric patients. *J Surg Res.* 2016;202(2):422-7.
57. Vitale DS, Hornung L, Lin TK, Nathan JD, Prasad S, Thompson T, et al. Blood Urea Nitrogen Elevation Is a Marker for Pediatric Severe Acute Pancreatitis. *Pancreas.* 2019;48(3):363-6.
58. Vitale D, Hornung L, Lin T, Thompson T, Nathan J, Abu-El-Haija M. Early predictors of severe acute pancreatitis in a prospective pediatric cohort. *Journal of Pediatric Gastroenterology and Nutrition.* 2017;65:S212-S3.
59. Hashimoto N, Yotani N, Michihata N, Tang J, Sakai H, Ishiguro A. Efficacy of pediatric acute pancreatitis scores at a Japanese tertiary center. *Pediatr Int.* 2016;58(3):224-8.
60. Walker H, Melling J, Jones M, Melling C. C-reactive protein accurately predicts severity of acute pancreatitis in children. *British Journal of Surgery.* 2021;108(SUPPL 6):vi181.
61. Walker H, Melling J, Jones M, Melling CV. C-reactive protein accurately predicts severity of acute pancreatitis in children. *J Pediatr Surg.* 2021.
62. Hornung LN, Farrell PR, Farmer P, Serrette A, Lin TK, Nathan JD, et al. BUN change from admission and levels at 24-48 hours are significant predictors of severity in pediatric acute pancreatitis. *Pancreas.* 2019;48(10):1445.
63. Wetherill C, Melling J, Jones M. C-reactive protein accurately predicts severity of acute pancreatitis in children. *Pancreatology.* 2013;13(2):e84.
64. Wetherill C, Melling J, Jones M. 48 hour C-reactive protein accurately predicts severity of acute pancreatitis in children. *Pancreatology.* 2013;13(1):e6.
65. Wetherill C, Melling J, Jones M. C-reactive protein accurately predicts severity of acute pancreatitis in children. *Pancreas.* 2012;41(8):1412-3.
66. Izquierdo YE, Fonseca EV, Moreno L, Montoya RD, Guerrero Lozano R. Utility of CT classifications to predict unfavorable outcomes in children with acute pancreatitis. *Pediatr Radiol.* 2018;48(7):954-61.
67. Izquierdo Y, Fonseca E, Moreno LA, Montoya R, Guerrero R. Utility of tomographic classifications in predicting unfavorable outcomes in children with acute pancreatitis. *Pancreatology.* 2017;17(4):S44.
68. Zheng W, Zhang L, Long G, Chen B, Shu X, Jiang M. Amalgamation of systemic inflammatory response syndrome score with C-reactive protein level in evaluating acute pancreatitis severity in children. *Scand J Gastroenterol.* 2018;53(6):755-9.
